# Supplementary material for: Individual and joint association of adulthood experiences and parental or teacher smoking with adolescent cigarette smoking
Source: PubMed Central journal article supplement (PMC7549380; doi:10.18332/tid/127519), 2020-10-01
Supplement: TID-18-83-s1.pdf [file TID-18-83-s1.pdf]

**Table S1** Characteristics of the study participants by smoking status

| Characteristics                                  | Total           | Non-daily smokers | Daily smokers   |
|--------------------------------------------------|-----------------|-------------------|-----------------|
|                                                  | N (%)           | N (%)             | N (%)           |
| Total                                            | 138542 (100.0)  | 133064 (95.8)     | 5478 (4.2)      |
| Age (mean $\pm$ sd)                              | 15.0 $\pm$ 0.01 | 15.0 $\pm$ 0.02   | 16.4 $\pm$ 0.02 |
| Sex (female)                                     | 67901 (48.0)    | 66881 (49.3)      | 1020 (17.4)     |
| School type                                      |                 |                   |                 |
| Middle                                           | 69623 (47.7)    | 68897 (49.2)      | 726 (12.6)      |
| General high                                     | 56412 (43.1)    | 53300 (42.5)      | 3112 (57.1)     |
| Vocational high                                  | 12104 (9.2)     | 10496 (8.3)       | 1608 (30.2)     |
| Household wealth                                 |                 |                   |                 |
| High                                             | 47971 (35.0)    | 46440 (35.3)      | 1531 (28.3)     |
| Middle                                           | 66515 (47.7)    | 64110 (47.9)      | 2405 (43.2)     |
| Low                                              | 24056 (17.3)    | 22514 (16.8)      | 1542 (28.5)     |
| Academic performances                            |                 |                   |                 |
| High                                             | 51891 (37.4)    | 50805 (38.1)      | 1086 (19.8)     |
| Middle                                           | 38845 (28.1)    | 37684 (28.4)      | 1161 (21.4)     |
| Low                                              | 47806 (34.6)    | 44575 (33.5)      | 3231 (58.7)     |
| Close friends smoking                            | 59089 (44.3)    | 53743 (42.0)      | 5346 (97.5)     |
| Smoking prevention education                     | 82426 (58.7)    | 79201 (58.8)      | 3225 (58.0)     |
| Tall stature ( $\geq 95^{\text{th}}$ percentile) | 7455 (5.6)      | 7105 (5.5)        | 350 (6.8)       |
| Precocious sexual development                    | 5852 (4.2)      | 5464 (4.1)        | 388 (6.9)       |
| Living away from parents                         | 2725 (1.8)      | 2520 (1.7)        | 205 (3.7)       |
| Having a job experience                          | 17945 (13.2)    | 14642 (11.1)      | 3303 (59.7)     |
| Parental smoking                                 | 64926 (46.2)    | 61827 (45.8)      | 3099 (56.2)     |
| Teacher smoking                                  | 52854 (37.9)    | 49368 (36.8)      | 3486 (64.0)     |

\*Frequency missing: school type (n=403), age (n=526), height (n=3687)

Variables with missing data were treated with the NOMCAR option

**Table S2** Association of adulthood experiences and significant adults smoking with daily cigarette smoking

|                                                                                                                                                                                                                                                                                                                                                                                                                                                                          | <b>Daily cigarette smoking</b> |                            |                            |
|--------------------------------------------------------------------------------------------------------------------------------------------------------------------------------------------------------------------------------------------------------------------------------------------------------------------------------------------------------------------------------------------------------------------------------------------------------------------------|--------------------------------|----------------------------|----------------------------|
|                                                                                                                                                                                                                                                                                                                                                                                                                                                                          | <b>Model 1<sup>a</sup></b>     | <b>Model 2<sup>b</sup></b> | <b>Model 3<sup>c</sup></b> |
|                                                                                                                                                                                                                                                                                                                                                                                                                                                                          | <b>aOR (95% CI)</b>            | <b>aOR (95% CI)</b>        | <b>aOR (95% CI)</b>        |
| <b>Adulthood experiences</b>                                                                                                                                                                                                                                                                                                                                                                                                                                             |                                |                            |                            |
| Tall stature                                                                                                                                                                                                                                                                                                                                                                                                                                                             | 1.26 (1.10, 1.43)              | 1.27 (1.11, 1.45)          | 1.23 (1.08, 1.40)          |
| Precocious Sexual development                                                                                                                                                                                                                                                                                                                                                                                                                                            | 1.40 (1.21, 1.62)              | 1.40 (1.21, 1.63)          | 1.36 (1.17, 1.58)          |
| Living away from parents                                                                                                                                                                                                                                                                                                                                                                                                                                                 | 1.32 (1.11, 1.57)              | 1.32 (1.11, 1.58)          | 1.32 (1.10, 1.57)          |
| Job experience                                                                                                                                                                                                                                                                                                                                                                                                                                                           | 5.23 (4.88, 5.61)              | 5.20 (4.84, 5.57)          | 5.10 (4.76, 5.47)          |
| <b>Significant adult smoking</b>                                                                                                                                                                                                                                                                                                                                                                                                                                         |                                |                            |                            |
| Parental smoking                                                                                                                                                                                                                                                                                                                                                                                                                                                         |                                | 1.31 (1.23, 1.40)          |                            |
| Teacher smoking                                                                                                                                                                                                                                                                                                                                                                                                                                                          |                                |                            | 1.71 (1.59, 1.83)          |
| <p>a: Model 1 adjusted for age (continuous), sex (male/female), school type (middle/general high/vocational high), close friends smoking (yes/no), participation in smoking prevention education (yes/no), perceived household wealth (high/mid/low), perceived academic performance (high/mid/low)</p> <p>b: Model 2 additionally adjusted for parental smoking (yes/no) to Model 1</p> <p>c: Model 3 additionally adjusted for teacher smoking (yes/no) to Model 1</p> |                                |                            |                            |

**Table S3** Additive interactive effect of adulthood experiences and parental smoking on the risk of adolescent daily cigarette smoking

| Adulthood experiences           | Daily cigarette smoking |                               |                   |                               | RERI<br>(95% CI); <i>P</i>      |
|---------------------------------|-------------------------|-------------------------------|-------------------|-------------------------------|---------------------------------|
|                                 | Non-smoking parents     |                               | Smoking parents   |                               |                                 |
|                                 | N                       | aOR <sup>a</sup><br>(95% CI); | N                 | aOR <sup>a</sup><br>(95% CI); |                                 |
| Tall stature <sup>a</sup>       | No                      | 65728/2064                    | 1.00 (Reference)  | 56828/2780                    | 0.02 (-0.35, 0.40);<br>P=0.906  |
|                                 | Yes                     | 3797/167                      | 1.39 (1.17, 1.66) | 3308/183                      |                                 |
| Sexual development <sup>b</sup> | Normal                  | 68391/2205                    | 1.00 (Reference)  | 59209/2885                    | 0.49 (-0.01, 0.99)<br>P=0.054   |
|                                 | Precocious              | 2846/174                      | 1.36 (1.11, 1.66) | 2618/214                      |                                 |
| Residential status <sup>c</sup> | With parents            | 70063/2292                    | 1.00 (Reference)  | 60481/2981                    | -0.29 (-0.91, 0.32);<br>P=0.358 |
|                                 | Away from parents       | 1174/87                       | 1.65 (1.26, 2.16) | 1346/118                      |                                 |
| Job experience <sup>d</sup>     | No                      | 64370/999                     | 1.00 (Reference)  | 54052/1176                    | 1.16 (0.63, 1.70);<br>P<0.001   |
|                                 | Yes                     | 6867/1380                     | 5.37 (4.88, 5.90) | 7775/1923                     |                                 |

Covariates adjusted for all models are: age (continuous), sex (male/female), school type (middle/general high/vocational high), close friends smoking (yes/no), participation in smoking prevention education (yes/no), perceived household wealth (high/mid/low), perceived academic performance (high/mid/low)

a: adjusted for sexual development (normal/precocious), residential status (with/away from parents), job experience (yes/no) and the covariates

b: adjusted for tall stature (yes/no), residential status (with/away from parents), job experience (yes/no) and the covariates

c: adjusted for tall stature (yes/no), sexual development (normal/precocious), job experience (yes/no) and the covariates

d: adjusted for tall stature (yes/no), sexual development (normal/precocious), residential status (with/away from parents) and the covariates

**Table S4** Additive interactive effects of adulthood experiences and teacher smoking on the risk of adolescent daily cigarette smoking

| Adulthood experiences           | Daily cigarette smoking     |                               |                      |                               | RERI<br>(95% CI); <i>P</i>     |
|---------------------------------|-----------------------------|-------------------------------|----------------------|-------------------------------|--------------------------------|
|                                 | Hasn't seen teacher smoking |                               | Seen teacher smoking |                               |                                |
|                                 | N                           | aOR <sup>a</sup><br>(95% CI); | N                    | aOR <sup>a</sup><br>(95% CI); |                                |
| Tall stature <sup>a</sup>       | No                          | 77390/1803                    | 1.00 (Reference)     | 45166/3041                    | 0.23 (-0.20, 0.66);<br>P=0.294 |
|                                 | Yes                         | 4200/117                      | 1.31 (1.07, 1.61)    | 2905/233                      |                                |
| Sexual development <sup>b</sup> | Normal                      | 80470/1875                    | 1.00 (Reference)     | 47130/3215                    | 0.15 (-0.41, 0.72);<br>P=0.593 |
|                                 | Precocious                  | 3226/117                      | 1.58 (1.26, 1.98)    | 2238/271                      |                                |
| Residential status <sup>c</sup> | With parents                | 82158/1926                    | 1.00 (Reference)     | 48386/3347                    | 0.81 (0.05, 1.58);<br>P=0.037  |
|                                 | Away from parents           | 1538/66                       | 1.21 (0.91, 1.63)    | 982/139                       |                                |
| Job experience <sup>d</sup>     | No                          | 75971/834                     | 1.00 (Reference)     | 42451/1341                    | 2.74 (2.01, 3.48);<br>P<0.001  |
|                                 | Yes                         | 7725/1158                     | 5.37 (4.82, 6.00)    | 6917/2145                     |                                |

Covariates adjusted for all models are: age (continuous), sex (male/female), school type (middle/general high/vocational high), close friends smoking (yes/no), participation in smoking prevention education (yes/no), perceived household wealth (high/mid/low), perceived academic performance (high/mid/low)

a: adjusted for sexual development (normal/precocious), residential status (with/away from parents), job experience (yes/no) and the covariates

b: adjusted for tall stature (yes/no), residential status (with/away from parents), job experience (yes/no) and the covariates

c: adjusted for tall stature (yes/no), sexual development (normal/precocious), job experience (yes/no) and the covariates

d: adjusted for tall stature (yes/no), sexual development (normal/precocious), residential status (with/away from parents) and the covariates
